# Supplementary material for: Gtf2ird1-Dependent Mohawk Expression Regulates Mechanosensing Properties of the Tendon
Source: PubMed Central journal article supplement (PMC4836271; doi:10.1128/mcb.00950-15), 2016-04-01
Supplement: MCB.00950-15_zmb999101200so1.pdf [file MCB.00950-15_zmb999101200so1.pdf]

## Supplementary Figure S1. siGtf2ird1 efficacy

### A qRT-PCR confirms siGtf2ird1 efficacy

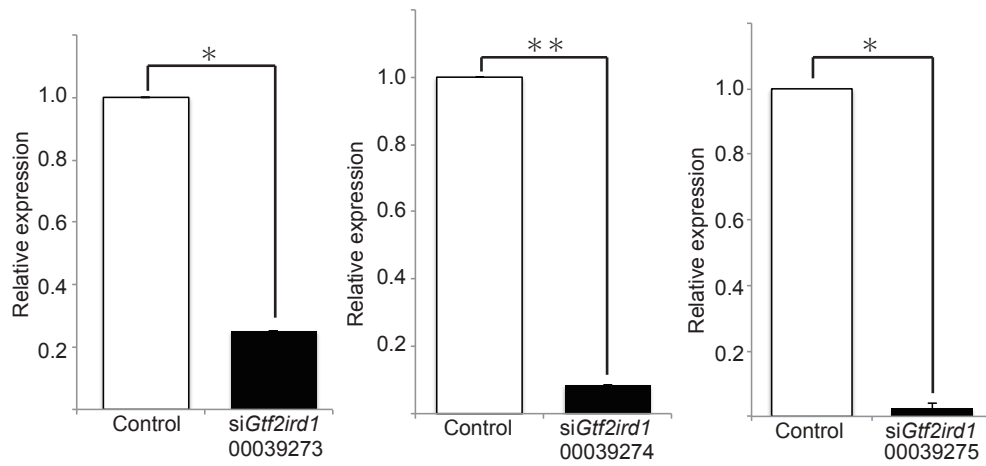

### B Gtf2ird1 knockdown is confirmed by western blotting

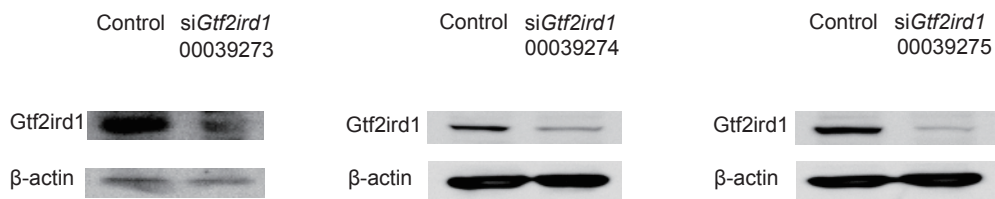

**Supplementary Figure S2. Exogenous GTF2IRD1 is distributed in both cytoplasm and nucleus**

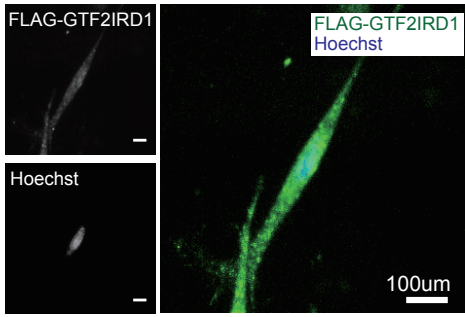

## Supplementary Figure S3. Cellular stretch induces nuclear translocation in *Mkx* knockdown tenocytes

Subcellular localization of Gtf2ird1 with and without cellular stretch in *Mkx* knockdown cells.

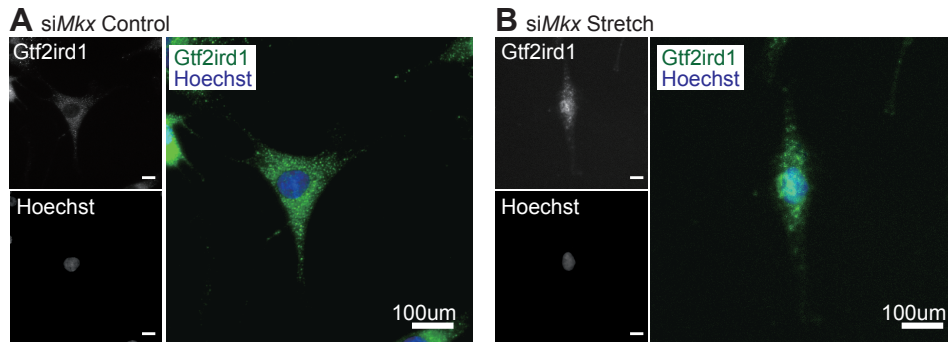

1 **Supplementary Figure Legends.**

2

3 **Supplementary Figure S1. *siGtf2ird1* efficacy.**

4 (A) *siGtf2ird1* efficacy was confirmed by qRT-PCR.

5 (B) *siGtf2ird1* efficacy was also confirmed by western blotting. *siGtf2ird1* (00039274) was

6 selected for all *siGtf2ird1* experiments in this article.

7

8 **Supplementary Figure S2. Exogenous GTF2IRD1 transfection is distributed in both**  
9 **cytoplasm and nucleus.**

10 Immunocytochemistry FLAG-GTF2IRD1 transfected tenocytes demonstrate a general  
11 induction of GTF2IRD1 both in nucleus and in cytoplasm. Anti-FLAG antibody was used  
12 as the primary antibody. (Green: FLAG-GTF2IRD1, Blue: Hoechst. Bars represent 100nm).

13

14 **Supplementary Figure S3. Cellular stretch induces nuclear translocation in Mxk**  
15 **knockdown tenocytes.**

16 (A) Subcellular localization of Mxk knockdown tenocytes demonstrate cytoplasmic  
17 localization of Gtf2ird1. (Green: Gtf2ird1, Blue: Hoechst. Bars represent 100nm)

18 (B) Subcellular localization of Mxk knockdown tenocytes demonstrate predominantly  
19 nuclear localization after stretch. (Green: Gtf2ird1, Blue: Hoechst. Bars represent  
20 100nm)
