# Supplementary material for: Gtf2ird1-Dependent Mohawk Expression Regulates Mechanosensing Properties of the Tendon
Source: PubMed Central journal article supplement (PMC4836271; doi:10.1128/mcb.00950-15), 2016-04-01
Supplement: MCB.00950-15_zmb999101200so2.pdf [file MCB.00950-15_zmb999101200so2.pdf]

## Supplementary Tables

**Supplementary Table 1. List of primers for qRT-PCR**

Mouse

| <b>Gene name</b> | <b>Forward Primer</b>    | <b>Reverse Primer</b>      |
|------------------|--------------------------|----------------------------|
| <i>Gapdh</i>     | TTGTGGAAGGGCTCATGACC     | TCTTCTGGGTGGCAGTGATG       |
| <i>Mkx</i>       | ACAATCCACACACAGGGCCG     | GGTCTGCCGCCAGCTTTTATC      |
| <i>Gtf2ird1</i>  | TCGGATGTGTACCTGCTGCA     | TCCCTGAGCAGCCTCTCATA       |
| <i>Scx</i>       | CCTTCTGCCTCAGCAACCAG     | GGTCCAAAGTGGGGCTCTCCGTGACT |
| <i>Tnmd</i>      | CTTTACCTCCACCAGGGCAACAGG | GCTTGATCTCGTTCCCATCCAG     |
| <i>Col1a1</i>    | GAGCGGAGAGTACTGGATCG     | GCTTCTTTTCCTTGGGGTTC       |
| <i>Col1a2</i>    | CCAGCGAAGAACTCATACAGC    | GGACACCCCTTCTACGTTGT       |
| <i>Fmod</i>      | CTTTACCTCCAGGGCAACAGG    | GCTTGATCTCGTTCCCATCCAG     |
| <i>Lpl</i>       | AAGCTGGTGGGAAATGATGTGG   | CCGTTCTGCATACTCAAAGTTAGG   |

Rat

| <b>Gene name</b> | <b>Forward Primer</b>     | <b>Reverse Primer</b>       |
|------------------|---------------------------|-----------------------------|
| <i>Gapdh</i>     | AGACAGCCGCATCTTCTTGT      | CCACAGTCTTCTGAGTGGCA        |
| <i>Mkx</i>       | GACGACGGCTGAAGAACATG      | CCTCTTCGTTTCATGTGAGTTCTTGG  |
| <i>Gtf2ird1</i>  | ATCTACCGAGTCCTGGCCAC      | CCGTTGGTGGGGATGTCACA        |
| <i>Scx</i>       | CCCAAACAGATCTGCACCTT      | CTTCAGTGGCTTCCACCTTC        |
| <i>Tnmd</i>      | CTACAGCAATGGCGAGAAGAAGAAG | GACCTACAAAGTAGATGCCAGTGTATC |
| <i>Col1a1</i>    | GTCCGAGGTCTAATGGAGATGC    | GGTCCAGGGAATCCGATGT         |
| <i>Col1a2</i>    | CCTGGAGAACCTGGTCTCAT      | GGCCAACATTTCCAGGAG          |
| <i>Fmod</i>      | CAAGGCAACAGGATCAATGAG     | CTGCAGCTTGGAGAAGTTCA        |
| <i>Lpl</i>       | CTTCAACCACAGCAGCAAAA      | TAGACTGGTTGTATCGGGCC        |

**Supplementary Table 2. Deletion construct primers for luciferase Assay**

|                         |                                 |
|-------------------------|---------------------------------|
| luc 1 Fw Primer (+NotI) | AAAGCGGCCGCTGCATGTCGGCCATTTAGC  |
| luc 2 Fw Primer (+NotI) | AAAGCGGCCGCACCGAAGGCTTGTGAGATGC |
| luc 3 Fw Primer (+NotI) | AAAGCGGCCGCCTGTATCTCTTATGCGCGGC |
| luc 4 Fw Primer (+NotI) | AAAGCGGCCGCGGGGCACATGTAGATCCGAG |
| luc 5 Fw Primer (+NotI) | AAAGCGGCCGCGTCTGAGATCTTGTGGGGG  |
| luc 6 Fw Primer (+NotI) | AAAGCGGCCGCGCGCTTGTCCGATTCTCAC  |
| Rv Primer               | TTCGAGTGGGTAGAATGGCG            |

**Supplementary Table 3. Deletion construct primers with TK promoter**

|                             |                            |
|-----------------------------|----------------------------|
| del 1 Fw -663 (+EcoRV)      | GATATCGGGGCACATGTAGATCCGAG |
| del 1 Rv -334 (+BglII)      | AGATCTGCGGTGCAAATCCTGCGTTT |
| del 2 Fw -354 (+EcoRV)      | GATATCAAACGCAGGATTTGCACCGC |
| del 2 Rv -25 (+BglII)       | AGATCTCATGTTTCCCGACTGTCCGG |
| del 3 Fw -45 (+EcoRV)       | GATATCCCGGACAGTCGGGAAACATG |
| del 3 Rv +282 (+BglII)      | AGATCTCCCCACAAGATCTCAGACGG |
| del 4 Fw cons -519 (+EcoRV) | GATATCCTCCACAAGCCTGGACTTTG |
| del 4 Rv cons -373 (+BglII) | AGATCTAAATGTCACCAACCCAGGCC |

**Supplementary Table 4. Deletion of 68bp sequence by inverse PCR**

|                  |                      |
|------------------|----------------------|
| 68bp Deletion Fw | CCGACACTAGGAGCAGCTAA |
| 68bp Deletion Rv | GCTGGAGGTTAGAGCTTCTT |

**Supplementary Table 5. ChIP primers**

| Primer site (kb) |    | Sequence              |
|------------------|----|-----------------------|
| +2.0             | Fw | TTATTCTGCTCCGCTGCCT   |
|                  | Rv | AATCAAGCTCCCACACCTCT  |
| +0.9             | Fw | AGGACTGGACTGGTGGAAAG  |
|                  | Rv | AAAGCAAGTTTGGGAGCCTG  |
| +0.2             | Fw | AAATAAAGCCGAGACGACGC  |
|                  | Rv | CTCAGGACTAGGCACACTCC  |
| -0.3             | Fw | AAGACACAGGATTGACCCG   |
|                  | Rv | TTCCTCTTGCCTCAGAGAA   |
| -0.6             | Fw | CTGGGGTGCTTGATAGATCCA |
|                  | Rv | GGGAAAGGAGAGCTCAGGTG  |
| -1.0             | Fw | CCGGGAACAGCACAAAAGG   |
|                  | Rv | GAACTCAGCAAGGCACGATT  |
| -1.5             | Fw | ACACAGCTCCGTAATCCAGT  |
|                  | Rv | GTGCAACCTTCCCTTCTGAC  |
| -1.8             | Fw | TTAACACGGGCCCTCTACTG  |
|                  | Rv | AGCACCTTAGTCACATGAGGT |
| -2.3             | Fw | CCAAAAGCAACTCCCTTACA  |
|                  | Rv | AGCTAGGGACACATCAGAACA |
| -3.8             | Fw | ATTGCACAAGGAAAGGAGGC  |
|                  | Rv | TCTCCTTCTCCCCTACCTC   |
| -4.5             | Fw | ACAGGGTAAGGATGGAGCAG  |
|                  | Rv | AGAGAGCATATGTCGGTGGGA |
| <i>Hlfoo</i>     | Fw | TTGTTGTGAAAGCGGAGTG   |
|                  | Rv | AATGCAGATGGTTGGGCTTG  |
